# Supplementary material
Source: PubMed Central journal article supplement (PMC3582384)
Supplement: NIHMS431415-supplement-1_si_001.pdf [file NIHMS431415-supplement-1_si_001.pdf]

## SUPPORTING INFORMATION

Light-Induced Subunit Dissociation by a LOV domain Photoreceptor from  
*Rhodobacter sphaeroides*

*Karen S. Conrad, Alexandrine M. Bilwes, Brian R. Crane\**

Department of Chemistry and Chemical Biology, Cornell University, Ithaca, NY  
14853, United States

### Table of Contents

|                                                                                   |   |
|-----------------------------------------------------------------------------------|---|
| Table S1. Structural and refinement statistics for RsLOV crystallographic data... | 2 |
| Figure S1. Data obtained by SEC-MALS.....                                         | 3 |
| Table S2. Molecular weight data obtained by SEC-MALS.....                         | 3 |
| Table S3. SAXS data and statistics from GNOM and ATSAS suite.....                 | 4 |
| Figure S4. Data obtained by SAXS light state samples.....                         | 5 |
| Figure S5. Data obtained by SAXS dark state samples.....                          | 6 |

Table S1. Structural and refinement statistics for RsLOV crystallographic data of the dark and light state structures and L32V and A138Y dark state variant structures.

|                                                         | Dark <sub>1</sub>                              | Dark <sub>2</sub>        | Light                    | L32V<br>variant                                | A138Y<br>Variant         |
|---------------------------------------------------------|------------------------------------------------|--------------------------|--------------------------|------------------------------------------------|--------------------------|
| <b>Data Collection</b>                                  |                                                |                          |                          |                                                |                          |
| Space group                                             | P 2 <sub>1</sub> 2 <sub>1</sub> 2 <sub>1</sub> | P 6 <sub>5</sub>         | P 6 <sub>5</sub>         | P 2 <sub>1</sub> 2 <sub>1</sub> 2 <sub>1</sub> | P 6 <sub>5</sub>         |
| a, b, c (Å)                                             | 65.8,<br>70.5,<br>74.4                         | 108.1,<br>108.1,<br>84.6 | 109.4,<br>109.4,<br>85.5 | 54.4,<br>73.2,<br>95.3                         | 105.9,<br>105.9,<br>84.1 |
| Unique reflections                                      | 9886                                           | 28665                    | 21851                    | 28265                                          | 15712                    |
| Resolution (Å)                                          | 2.70                                           | 2.20                     | 2.34                     | 1.95                                           | 2.64                     |
| Last shell (Å)                                          | 2.70 – 2.75                                    | 2.20 – 2.24              | 2.34 – 2.38              | 1.95 – 1.98                                    | 2.64 – 2.69              |
| Redundancy (overall/last shell)                         | 3.7/3.1                                        | 11.3/10.5                | 3.6/3.4                  | 13.8/9.7                                       | 10.7/9.6                 |
| Completeness (%/last shell)                             | 99.8/99.2                                      | 100.0/100.0              | 88.7/93.1                | 99.6/90.9                                      | 99.8/100.0               |
| I/σ (overall/last shell)                                | 31.1/4.5                                       | 52.7/4.0                 | 21.7/3.1                 | 30.5/4.6                                       | 46.0/5.3                 |
| Linear R-fac (R <sub>merge</sub> ) (overall/last shell) | 0.107/0.36<br>6                                | 0.079/0.58<br>5          | 0.115/0.50<br>7          | 0.092/0.395                                    | 0.075/0.51<br>1          |
| <b>Refinement</b>                                       |                                                |                          |                          |                                                |                          |
| R <sub>work</sub> (%)                                   | 0.193                                          | 0.207                    | 0.204                    | 0.173                                          | 0.191                    |
| R <sub>free</sub> (%)                                   | 0.251                                          | 0.226                    | 0.244                    | 0.201                                          | 0.240                    |
| No. atoms                                               | 2791                                           | 2870                     | 2885                     | 3150                                           | 2872                     |
| No. water molecules                                     | 2                                              | 63                       | 80                       | 332                                            | 41                       |
| Mean B value                                            | 57.4                                           | 59.1                     | 37.2                     | 22.6                                           | 38.8                     |
| B value (waters)                                        | 49.4                                           | 59.0                     | 29.0                     | 28.5                                           | 28.9                     |
| B value (ligands/ions)                                  | 49.2                                           | 51.9                     | 28.35                    | 20.3                                           | 22.1                     |
| RMSD from ideal bond lengths (Å)                        | 0.008                                          | 0.008                    | 0.008                    | 0.007                                          | 0.008                    |
| RMSD from ideal bond angles (°)                         | 1.2                                            | 1.2                      | 1.3                      | 1.1                                            | 1.4                      |
| Ramachandran statistics (%)                             |                                                |                          |                          |                                                |                          |
| Most favored                                            | 88.0                                           | 91.7                     | 90.1                     | 94.7                                           | 89.4                     |
| Additionally Allowed                                    | 11.7                                           | 7.6                      | 9.6                      | 4.6                                            | 9.3                      |
| Generously Allowed                                      | 0.3                                            | 0.7                      | 0.3                      | 0.7                                            | 1.3                      |
| Disallowed                                              | 0.0                                            | 0.0                      | 0.0                      | 0.0                                            | 0.0                      |
| PDB entry                                               | 4HJ4                                           | 4HJ6                     | 4HNB                     | 4HIA                                           | 4HJ3                     |

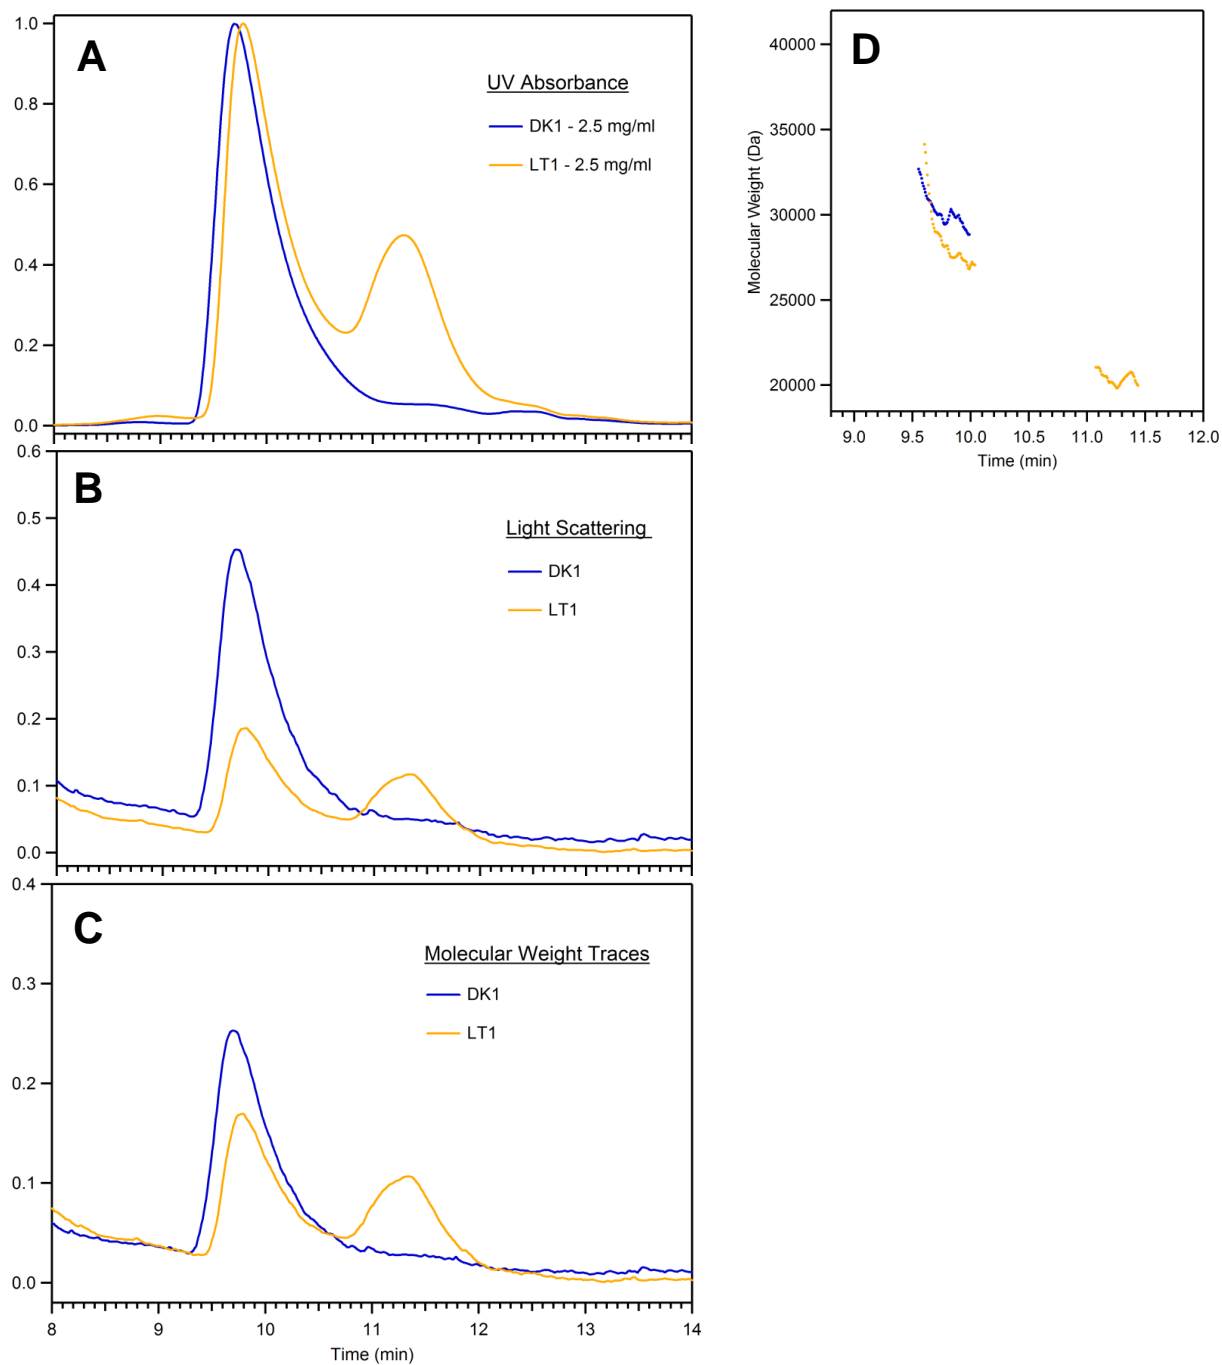

Figure S1. Data obtained by SEC-MALS, dark state samples in blue, light state samples in red/orange (A) UV Absorbance (B) Light Scattering (C) Molecular weight traces (D) Molecular weight timepoints. Samples were run in the following order: LT then DK.

Table S2. Molecular weight data obtained by SEC-MALS.

| Sample          | Concentration (mg/mL) | Time (min) | Peak 1: MW (kDa) | Peak 2: MW (kDa) |
|-----------------|-----------------------|------------|------------------|------------------|
| Light 2.5 mg/mL | 2.5                   | 20         | 28.2             | 20.4             |
| Dark 2.5 mg/mL  | 2.5                   | 110        | 30.2             | ---              |

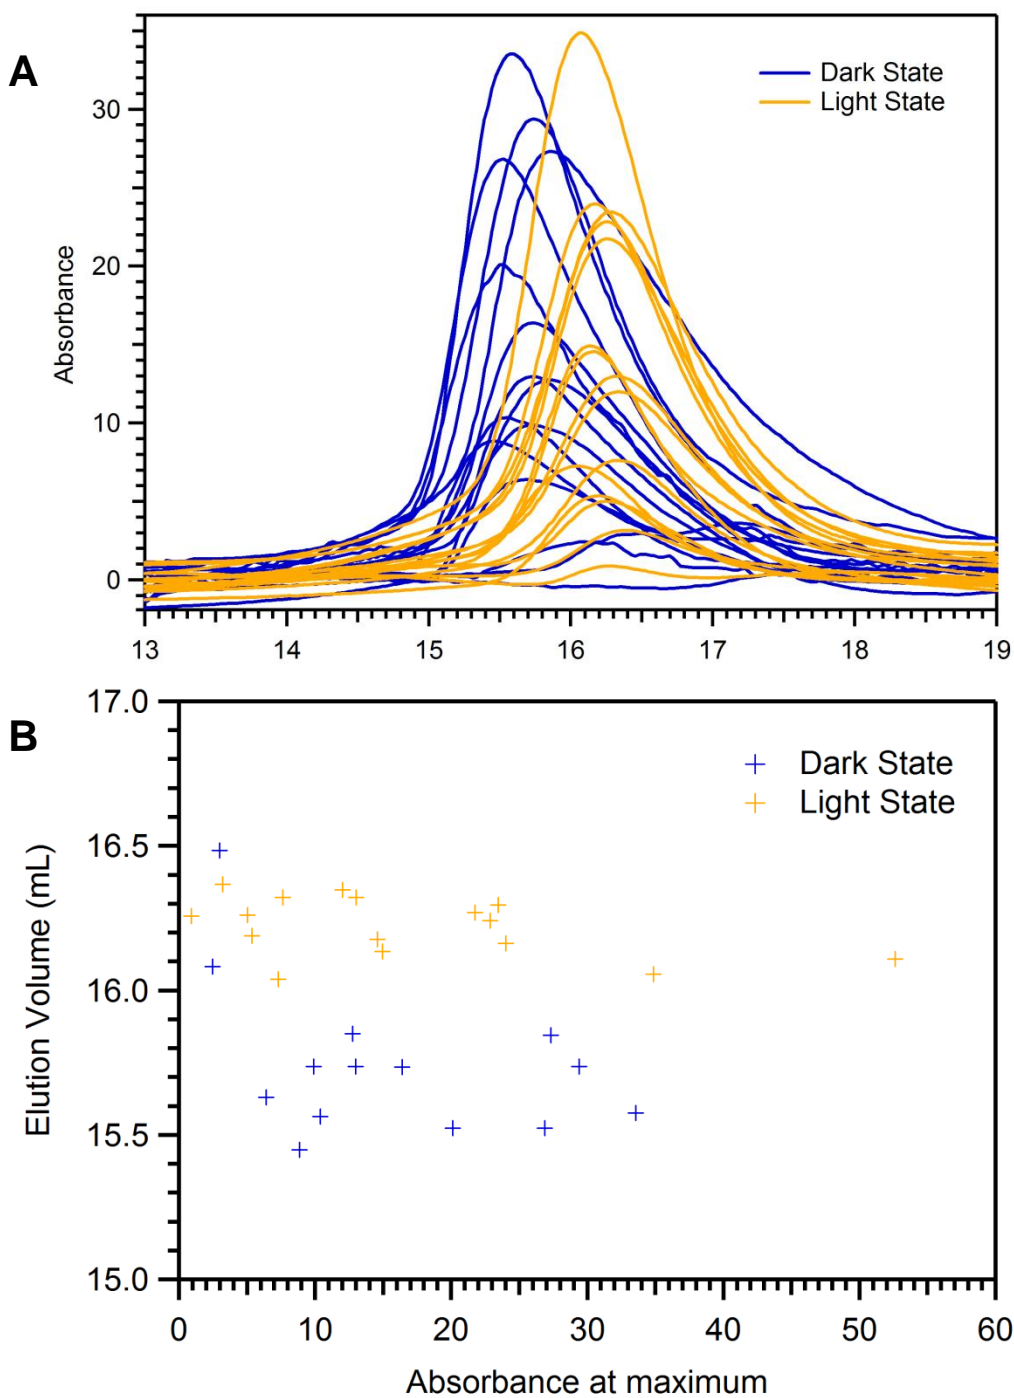

Figure S2. Data obtained by analytical SEC: dark state samples in blue, light state samples in orange (A) UV Absorbance (B) Elution volume at maximum absorbance at 280 nm for 30 samples.

Table S3. SAXS data generated from GNOM and shape reconstruction statistics using ATSAS suite.

| State, concentration (mg/mL) | Reciprocal space: R <sub>g</sub> | Real space: R <sub>g</sub> | s <sub>min</sub> | sR <sub>g</sub> limits | I(0)          | D <sub>max</sub> | NSD DAMAVER (var) 10 models | MW (kDa) | Total estimate |
|------------------------------|----------------------------------|----------------------------|------------------|------------------------|---------------|------------------|-----------------------------|----------|----------------|
| LT, 2.5                      | 20.87                            | 20.91 ± 0.13               | 0.0098           | 0.55 – 1.38            | 48.59 ± 0.25  | 65.36            | 0.548 ± 0.021               | 27.8     | 0.889          |
| LT, 5                        | 21.84                            | 21.86 ± 0.06               | 0.0098           | 0.38 – 1.03            | 90.51 ± 0.24  | 67.99            | 0.537 ± 0.016               | 30.8     | 0.827          |
| LT, 10                       | 23.47                            | 23.54 ± 0.21               | 0.0098           | 0.42 – 1.28            | 150.70 ± 0.67 | 93.88            | 0.586 ± 0.027               | 34.2     | 0.685          |
| DK, 2.5                      | 21.94                            | 21.99 ± 0.16               | 0.0098           | 0.52 – 1.30            | 57.10 ± 0.34  | 74.40            | 0.563 ± 0.030               | 31.4     | 0.844          |
| DK, 5                        | 23.24                            | 23.27 ± 0.10               | 0.0098           | 0.45 – 1.17            | 105.21 ± 0.21 | 76.02            | 0.583 ± 0.053               | 40.3     | 0.869          |
| DK, 10                       | 24.39                            | 24.41 ± 0.04               | 0.0098           | 0.45 – 1.26            | 172.64 ± 0.28 | 75.69            | 0.558 ± 0.019               | 42.9     | 0.715          |

$$s = 4\pi\sin(\theta)/\lambda$$

2θ = scattering angle

λ = radiation wavelength

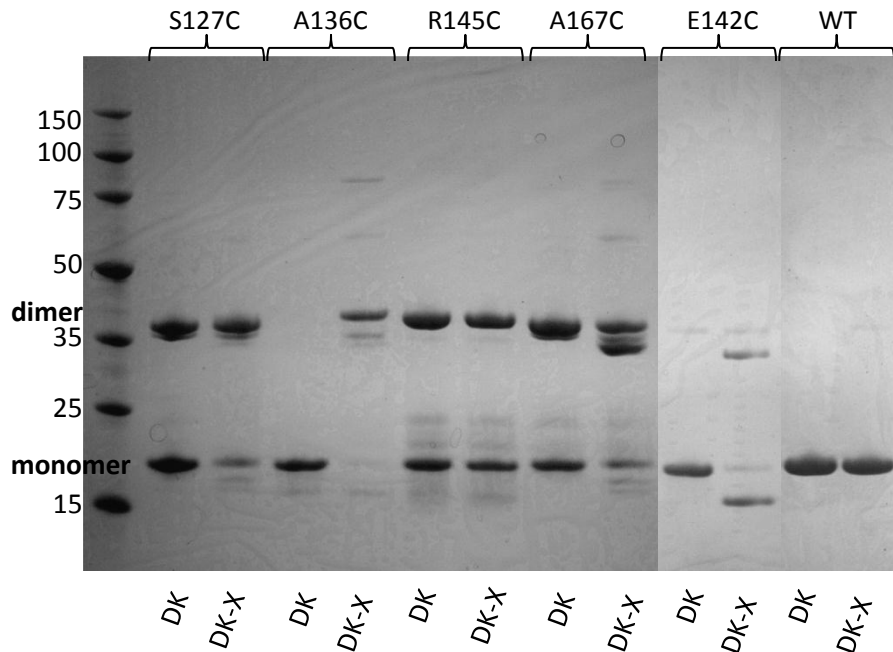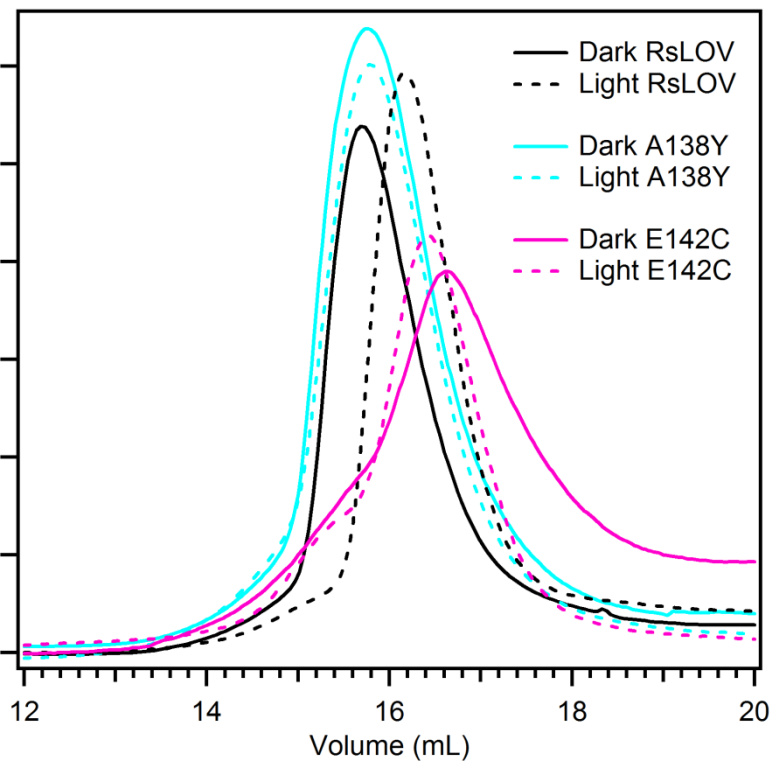

Figure S3. (A) SDS PAGE gel of variants S127C, A136C, R145C, E142C, and WT RsLOV in the dark, DK, and in the dark with addition of Cu(phen)<sub>3</sub> as crosslinking agent, DK-X. (B) Data obtained by analytical SEC: dark state samples in solid line, light state samples dashed: WT RsLOV (black), A138Y (aqua), E142C (pink).

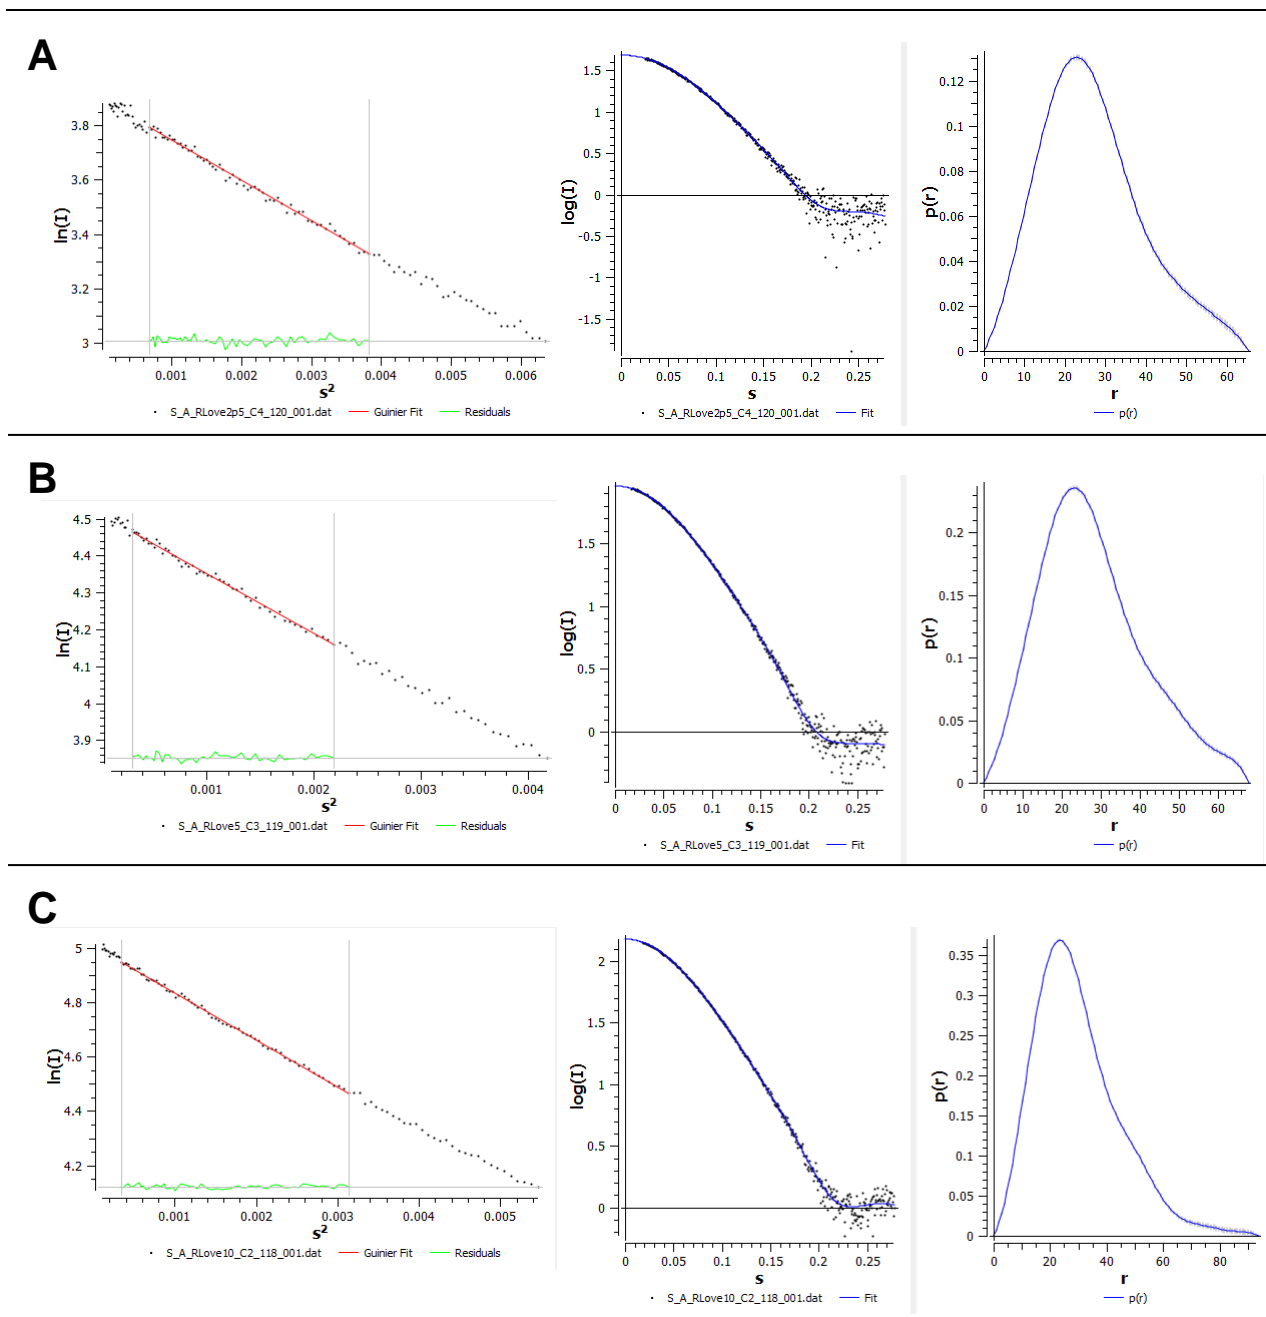

Figure S4. Data obtained by SAXS, light state samples of RsLOV (A) 2.5 mg/mL (B) 5.0 mg/mL (C) 10.0 mg/mL. Plots from left to right: Guinier plot,  $\ln(I)$  vs  $s^2$  (left),  $\log(I)$  vs  $s$  (middle),  $P(r)$  vs  $r$  (right).

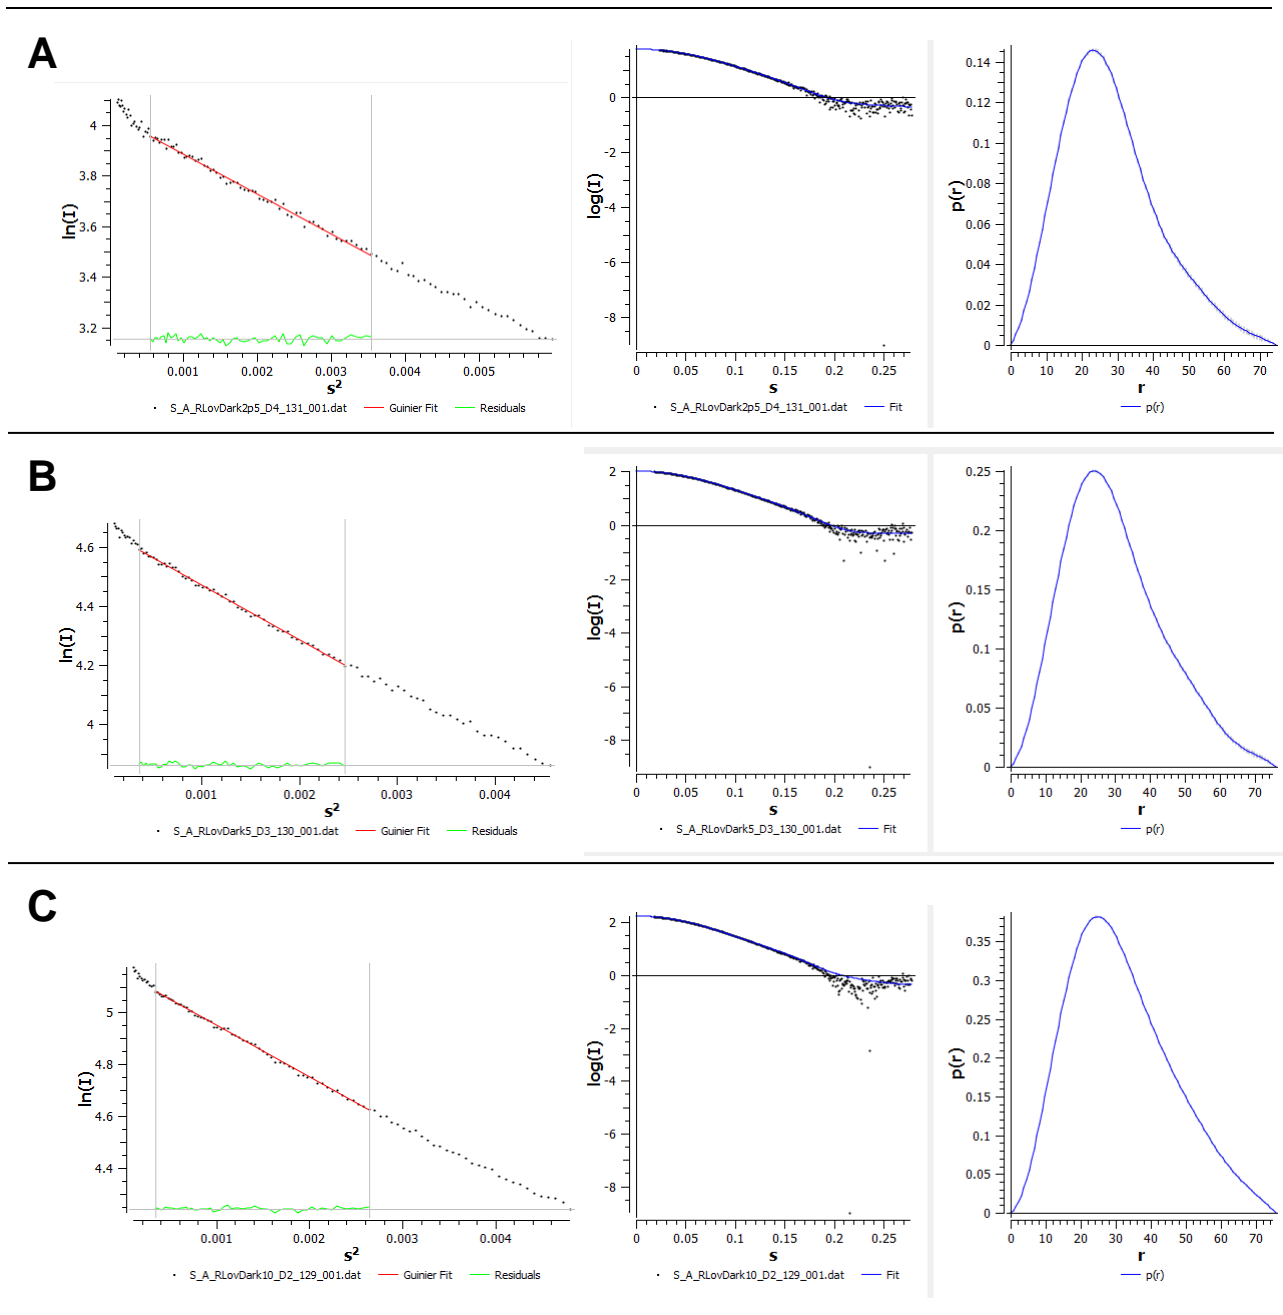

Figure S5. Data obtained by SAXS, dark state samples of RsLOV (A) 2.5 mg/mL (B) 5.0 mg/mL (C) 10.0 mg/mL. Plots from left to right: Guinier plot,  $\ln(I)$  vs  $s^2$  (left),  $\log(I)$  vs  $s$  (middle),  $P(r)$  vs  $r$  (right).
